# Supplementary material for: Effect of land-use practices on species diversity and selected soil property in Somodo Watershed South-Western Ethiopia
Source: PLoS One. 2021 May 28;16(5):e0252305. doi: 10.1371/journal.pone.0252305 (PMC8162689; doi:10.1371/journal.pone.0252305)
Supplement: S1 Data — (XLSX) [file pone.0252305.s001.xlsx]

## Sheet: Chemical properties
Treatments	Replecations	PH (H20)	Avai.P (ppm)	% Total. N	%OC	C:N
1	1	4.68	2.957	0.332	2.406	7.24699
1	2	5.06	2.791	0.239	2.307	9.65272
1	3	4.92	2.759	0.218	2.361	10.8303				Landuses
1	4	4.67	1.29	0.172	2.311	13.436				t1= Plantation
1	5	5.21	7.657	0.196	2.262	11.5408				t2= Farm forest
2	1	5.16	6.106	0.302	2.805	9.28808				t3= Cultivation
2	2	4.96	3.657	0.255	2.387	9.36078				t4= Home garden
2	3	4.86	0.882	0.187	2.293	12.262
2	4	4.6	0.882	0.211	2.785	13.1991
2	5	4.85	1.698	0.172	1.997	11.6105
3	1	4.84	2.841	0.221	2.042	9.23982
3	2	4.45	2.188	0.311	2.906	9.34405
3	3	5.06	1.535	0.28	2.984	10.6571
3	4	4.88	1.861	0.388	2.98	7.68041
3	5	5.26	1.29	0.346	2.97	8.58382
4	1	5.4	3.167	0.23	2.292	9.96522
4	2	5.21	4.473	0.23	2.954	12.8435
4	3	5.41	2.514	0.302	2.8	9.27152
4	4	5.47	4.7331	0.237	2.98	5.69957
4	5	5.6	5.127	0.238	2.991	12.5672
